# Supplementary material for: A pH-Sensitive Fluorescent Chemosensor Turn-On Based in a Salen Iron (III) Complex: Synthesis, Photophysical Properties, and Live-Cell Imaging Application
Source: MDPI journal article supplement (doi:10.3390/molecules28217237), 2023-10-24
Supplement: s1 [file s1]

## SUPPLEMENTARY MATERIALS

# A pH-Sensitive Fluorescent Chemosensor Turn-On Based in a Salen Iron (III) Complex: Synthesis, Photophysical Properties, and Live-Cell Imaging Application

Nicole Nilo <sup>1</sup>, Mauricio Reyna-Jeldes <sup>2,3</sup>, Alejandra A. Covarrubias <sup>3,4,5</sup>, Claudio Coddou <sup>3,4,6</sup>, Vania Artigas <sup>1</sup>, Mauricio Fuentealba <sup>1</sup>, Luis F. Aguilar <sup>1</sup>, Marianela Saldías <sup>7</sup> and Marco Mellado <sup>7,\*</sup>

- <sup>1</sup> Instituto de Química, Facultad de Ciencias, Pontificia Universidad Católica de Valparaíso, Valparaíso 2373223, Chile; nicole.nilo@pucv.cl (N.N.); vania.artigas@pucv.cl (V.A.); mauricio.fuentealba@pucv.cl (M.F.); luis.aguilar@pucv.cl (L.F.A.)
- <sup>2</sup> Laboratory of Cancer Biology, Department of Oncology, Old Road Campus Research Building, University of Oxford, Oxford OX3 7DQ, UK; mauricio.reynajeldes@oncology.ox.ac.uk
- <sup>3</sup> Laboratorio de Señalización Purinérgica, Departamento de Ciencias Biomédicas, Facultad de Medicina, Universidad Católica del Norte, Coquimbo 1781421, Chile; alejandra.covarrubias@ucn.cl (A.A.C.); ccoddou@ucn.cl (C.C.)
- <sup>4</sup> Millennium Nucleus for the Study of Pain (MiNuSPain), Santiago 8330025, Chile
- <sup>5</sup> Facultad de Ciencias Agropecuarias, Universidad del Alba, La Serena 1700000, Chile
- <sup>6</sup> Núcleo para el Estudio del Cáncer a Nivel Básico, Aplicado, y Clínico, Universidad Católica del Norte, Coquimbo 1781421, Chile
- <sup>7</sup> Instituto de Investigación y Postgrado, Facultad de Ciencias de la Salud, Universidad Central de Chile, Santiago 8330507, Chile; marianela.saldias@ucentral.cl
- \* Correspondence: marco.mellado@ucentral.cl; Tel.: +56-2-2582-6567

### Table of Content

|                                                                                                                                                                                                                                                             |   |
|-------------------------------------------------------------------------------------------------------------------------------------------------------------------------------------------------------------------------------------------------------------|---|
| 1. Supplementary Figures.....                                                                                                                                                                                                                               | 3 |
| Figure S1: FT-IR spectra of ligand HL1 and the complex C1 .....                                                                                                                                                                                             | 3 |
| Figure S2: FT-IR and Raman spectrum of compound C1. ....                                                                                                                                                                                                    | 3 |
| Figure S3: Molecular absorption properties of the iron (III) complex (C1). A. UV-Vis spectra at various concentrations. B. Linear fit of absorbance and concentration at 330 nm. C. Linear fit of absorbance and concentration at 504 nm. Solvent= ACN..... | 4 |
| Figure S4: Spectral and color change of the iron (III) complex after the interaction with several analytes. ....                                                                                                                                            | 5 |
| Figure S5: Kinetic profile of the interaction between the iron (III)-complex (C1) and the NaOH.....                                                                                                                                                         | 6 |
| Figure S6: Kinetic profile of the interaction between the iron (III)-complex (C1) and the NaOH in several solvents. ....                                                                                                                                    | 6 |
| Figure S7: Analytical graphs from titration of the iron (III)-complex (C1).....                                                                                                                                                                             | 7 |

|                                                                                                                                                                                    |    |
|------------------------------------------------------------------------------------------------------------------------------------------------------------------------------------|----|
| Figure S8: Electrostatic potential map (ESP) and molecular orbitals of the iron (III)-complex (C1) and the hydroxyl anion. ....                                                    | 7  |
| Figure S9: Internal energies of the iron (III)-complex (C1) and the intermediates proposed in the reaction mechanism.....                                                          | 8  |
| Figure S10: Comparison of the colorimetric changes between salicylaldehyde and the iron (III)-complex (C1) after and later the addition of NaOH dissolution.....                   | 8  |
| Figure S11: Overlapping experimental UV-Vis spectrum and all intermediates proposed in the reaction mechanism.....                                                                 | 9  |
| Figure S12: Experimental UV-Vis spectra of complex C1 + OH <sup>-</sup> and their calculated spectra.....                                                                          | 10 |
| Figure S13: Experimental UV-Vis spectra of complex C1 + OH <sup>-</sup> and the calculated spectra of proposal intermediate Int-1 together to each electronic transition. ....     | 11 |
| Figure S14: Experimental UV-Vis spectra of complex C1 + OH <sup>-</sup> and the calculated spectra of proposal intermediate Int-2 together to each electronic transition. ....     | 12 |
| Figure S15: Experimental UV-Vis spectra of complex C1 + OH <sup>-</sup> and the calculated spectra of proposal intermediate Int-3 together to each electronic transition. ....     | 13 |
| Figure S16: Experimental UV-Vis spectra of complex C1 + OH <sup>-</sup> and the calculated spectra of proposal intermediate phenolate together to each electronic transition. .... | 14 |
| 3. Supplementary Tables .....                                                                                                                                                      | 15 |
| Table S1: Crystal data and details of structure refinement of complex C1.....                                                                                                      | 15 |
| Table S2: Bond diantances and selected angles in the metal coordination sphere of C1 at 170 K.....                                                                                 | 16 |
| Table S3: Cartesian Coordinates of each atom from iron (III) complex (C1).....                                                                                                     | 17 |
| Table S4: Cartesian Coordinates of each atom from iron (III) complex (C1) with analyte OH <sup>-</sup> .....                                                                       | 19 |

## 2. Supplementary Figures

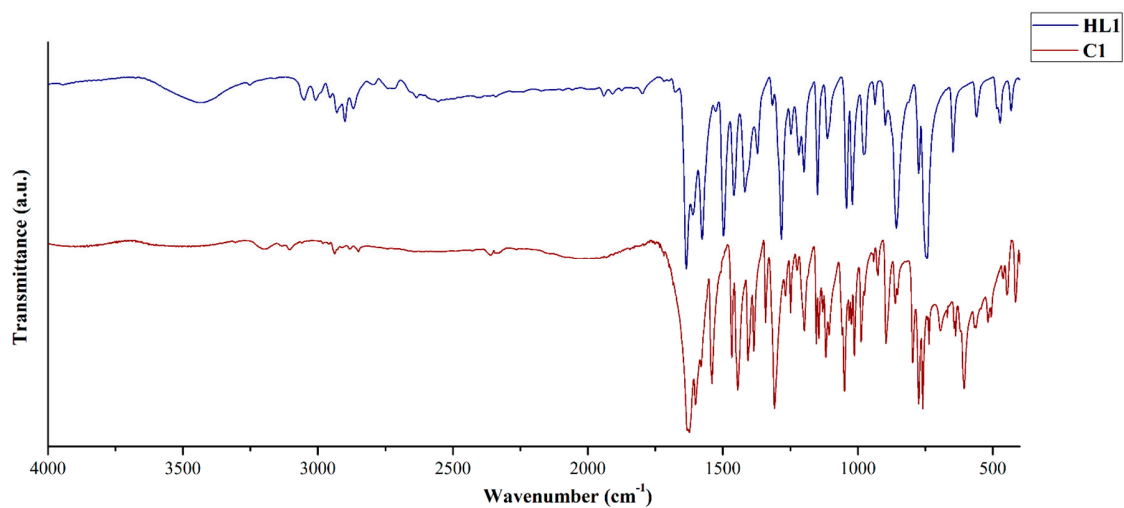

**Figure S1:** FT-IR spectra of ligand HL1 and complex C1

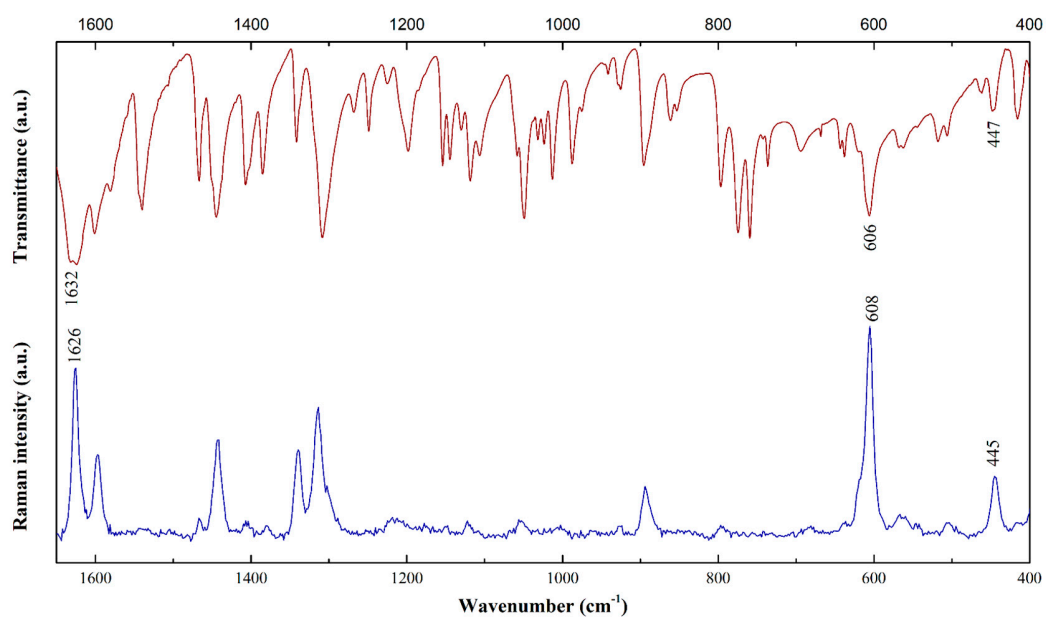

**Figure S2:** FT-IR and Raman spectrum of compound C1.

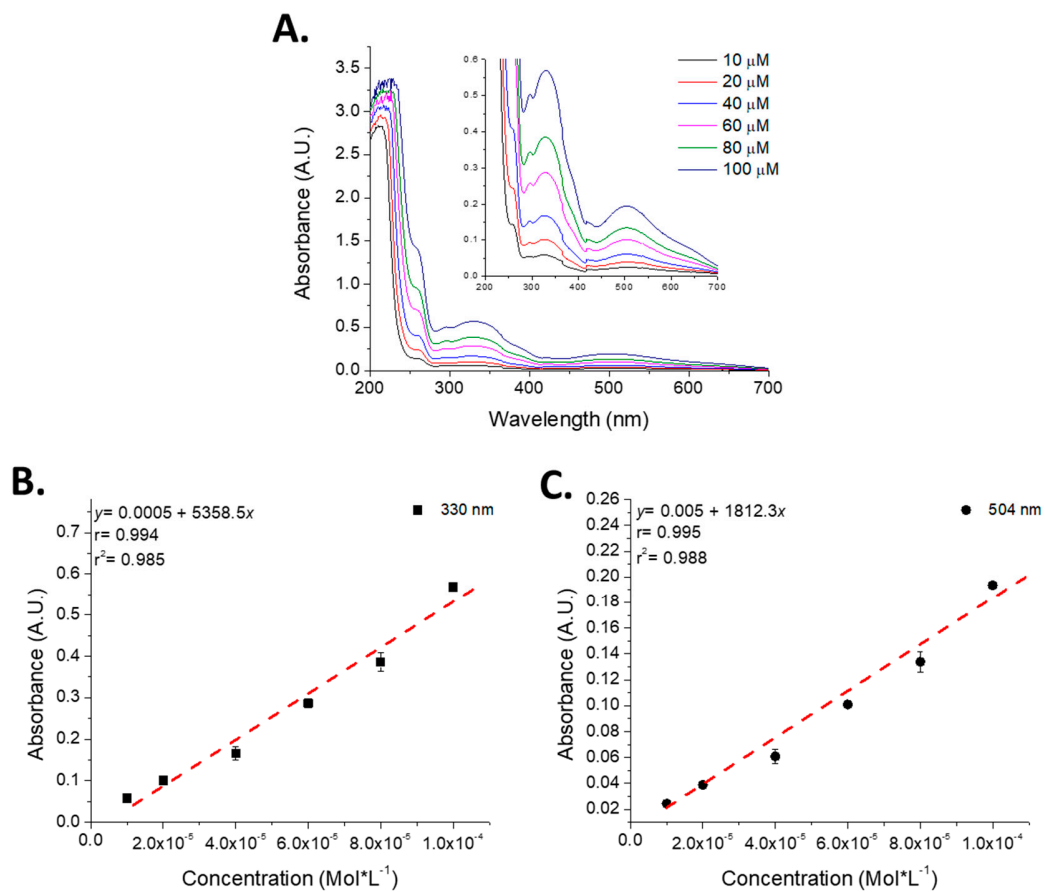

**Figure S3:** Molecular absorption properties of the iron (III) complex (C1). **A.** UV-Vis spectra at various concentrations. **B.** Linear fit of absorbance and concentration at 330 nm. **C.** Linear fit of absorbance and concentration at 504 nm. Solvent= ACN.

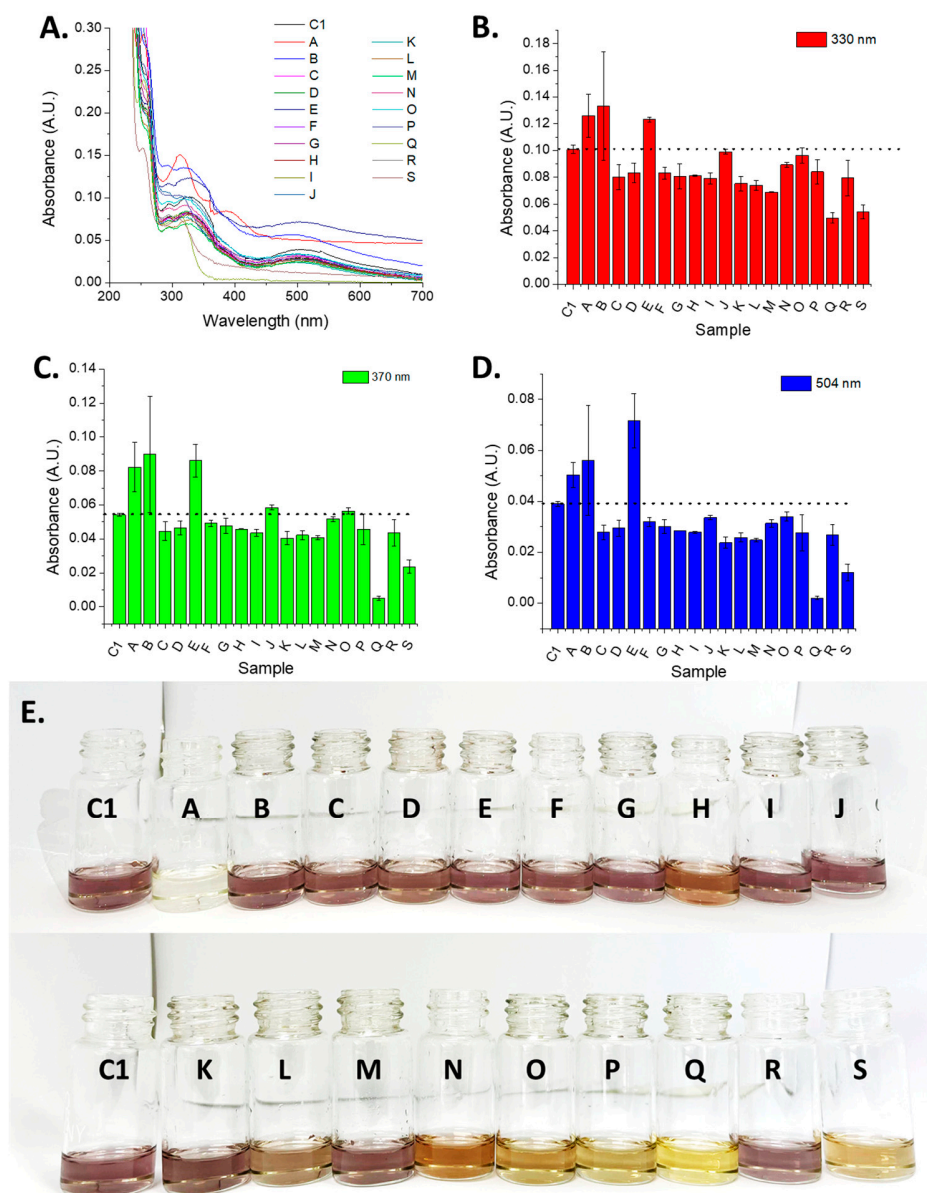

**Figure S4:** Spectral and color change of the iron (III) complex after the interaction with several analytes. **A.** Molecular absorption spectrum of iron (III)-complex (C1) and their interaction with several analytes. **B.** Variation of absorbance at  $\lambda = 330$  nm. **C.** Variation of absorbance at  $\lambda = 370$  nm. **D.** Variation of absorbance at  $\lambda = 504$  nm. **E.** Naked eye color change of the iron (III) complex with all analytes assessed. **Sample code:** **A.** Hydroxide ( $\text{OH}^-$ ), **B.** Metabisulfite ( $\text{S}_2\text{O}_5^{2-}$ ), **C.** Iodide ( $\text{I}^-$ ), **D.** Acetate ( $\text{MeCO}_2^-$ ), **E.** Nitrate ( $\text{NO}_3^-$ ), **F.** Sulfate ( $\text{SO}_4^{2-}$ ), **G.** Thiosulfate ( $\text{S}_2\text{O}_3^{2-}$ ), **H.** Bicarbonate ( $\text{HCO}_3^-$ ), **I.** Bisulfite ( $\text{HSO}_3^-$ ), **J.** Iodate ( $\text{IO}_3^-$ ), **K.** Cyanide ( $\text{CN}^-$ ), **L.** Fluoride ( $\text{F}^-$ ), **M.** Sulfide ( $\text{S}^{2-}$ ), **N.** Carbonate ( $\text{CO}_3^{2-}$ ), **O.** Citrate ( $\text{C}_6\text{H}_5\text{O}_7^{3-}$ ), **P.** Monoacid phosphate ( $\text{HPO}_4^{2-}$ ), **Q.** Diacid phosphate ( $\text{H}_2\text{PO}_4^-$ ), **R.** Arsenite ( $\text{AsO}_2^-$ ), **S.** Tartrate ( $\text{C}_4\text{H}_4\text{O}_6^{2-}$ ).  $C_{\text{C1}} = 20 \mu\text{M}$ ,  $C_{\text{Sample}} = 10$  mol equivalents, Solvent = ACN.

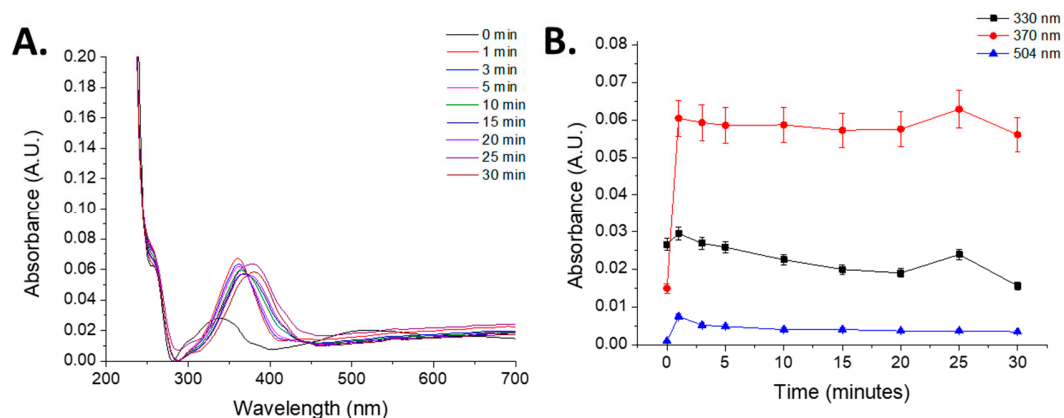

**Figure S5:** Kinetic profile of the interaction between the iron (III)-complex (C1) and NaOH. **A.** Overlapping spectra at different times. **B.** Variation of the main wavelength in the time.  $C_{C1} = 20 \mu\text{M}$ ,  $C_{NaOH} = 10$  mol equivalents, Solvent= ACN.

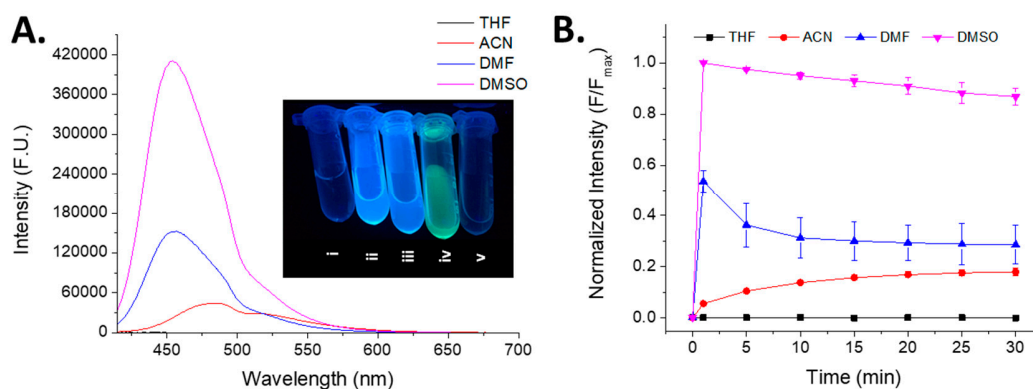

**Figure S6:** Kinetic profile of the interaction between the iron (III)-complex (C1) and NaOH using different solvents. **A.** Overlapping spectra at different times and naked-eye emission color changes. **B.** Variation of maximum emission wavelength in time.  $C_{C1} = 20 \mu\text{M}$ ,  $C_{NaOH} = 10$  mol equivalents, Incubation time: 3 min. **Image code:** **i:** iron (III)-complex dissolved in DMSO. **ii:** iron (III)-complex solved in ACN and 10 molar equivalents of NaOH. **iii:** iron (III)-complex dissolved in DMF and 10 molar equivalents of NaOH. **iv:** iron (III)-complex solved in DMSO and 10 molar equivalents of NaOH. **v:** iron (III)-complex solved in THF and 10 molar equivalents of NaOH.

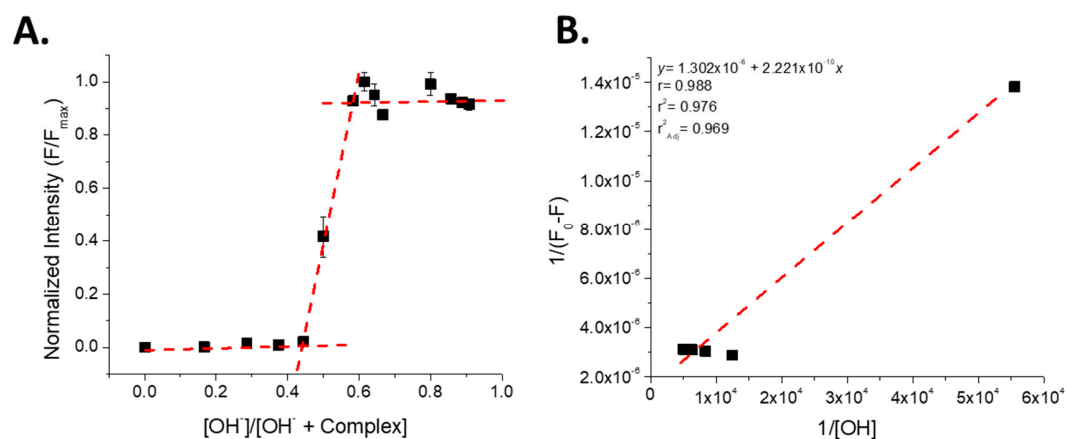

**Figure S7:** Analytical graphs from titration of the iron (III)-complex (C1). **A.** Job plot to determine the stoichiometric relationship between the iron (III)-complex (C1) and NaOH using the emission change and the molar fraction of the complex. **B.** Benesi-Hildebrand plot to determine the association constant to stoichiometric 1:1.  $C_{C1} = 20 \mu\text{M}$ ,  $\lambda_{\text{Ex}} = 399 \text{ nm}$ ;  $\lambda_{\text{Em}} = 456 \text{ nm}$ ; solvent = DMSO; incubation time = 3 min.

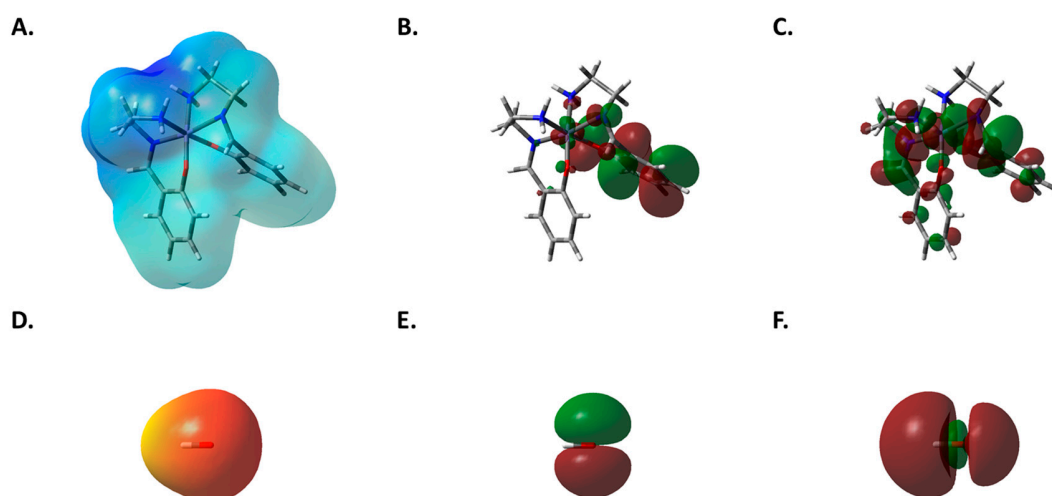

**Figure S8:** Electrostatic potential map (ESP) and molecular orbitals of the iron (III)-complex (C1) and the hydroxyl anion. **A.** ESP of the complex (C1). **B.** HOMO of the complex (C1). **C.** LUMO of the complex (C1). **D.** ESP of the hydroxyl anion. **E.** HOMO of the hydroxyl anion. **F.** LUMO of the hydroxyl anion.

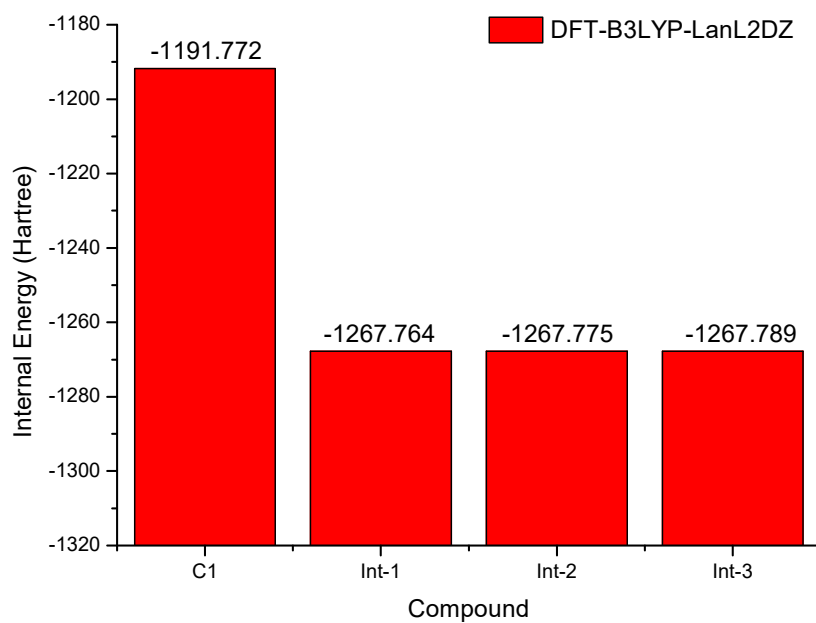

**Figure S9:** Internal energies of the iron (III)-complex (C1) and the intermediates proposed in the reaction mechanism.

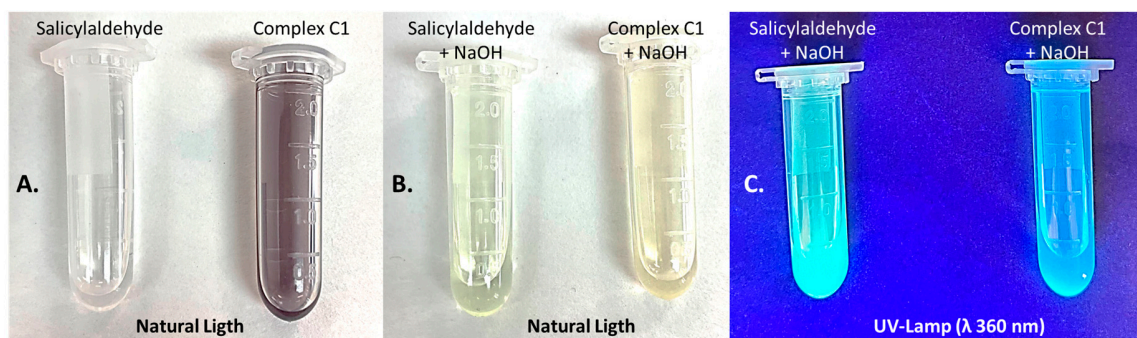

**Figure S10:** Comparison of the colorimetric changes between salicylaldehyde and the iron (III)-complex (C1) after and later the addition of NaOH dissolution.



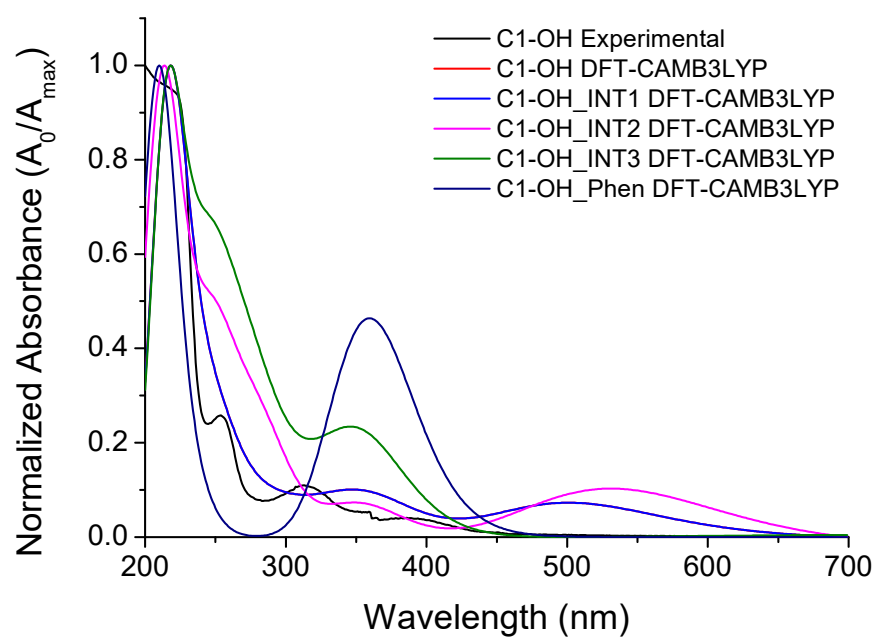

**Figure S11:** Overlapping experimental UV-Vis spectrum and all intermediates proposed in the reaction mechanism.

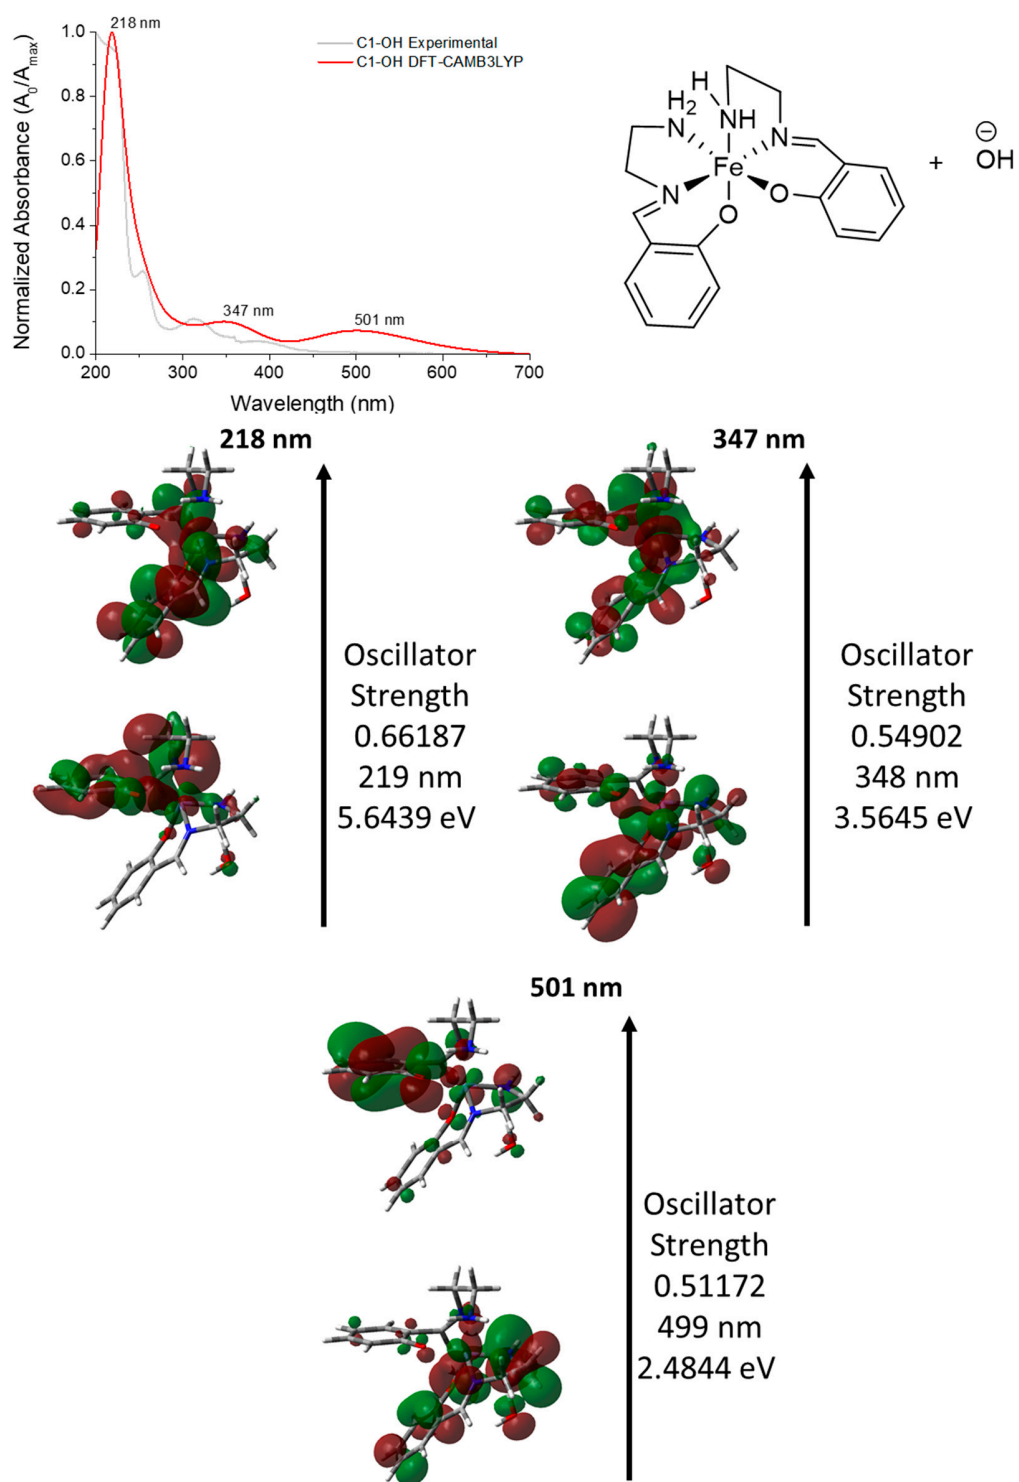

**Figure S12:** Experimental UV-Vis spectra of complex C1 + OH<sup>-</sup> and their calculated spectra

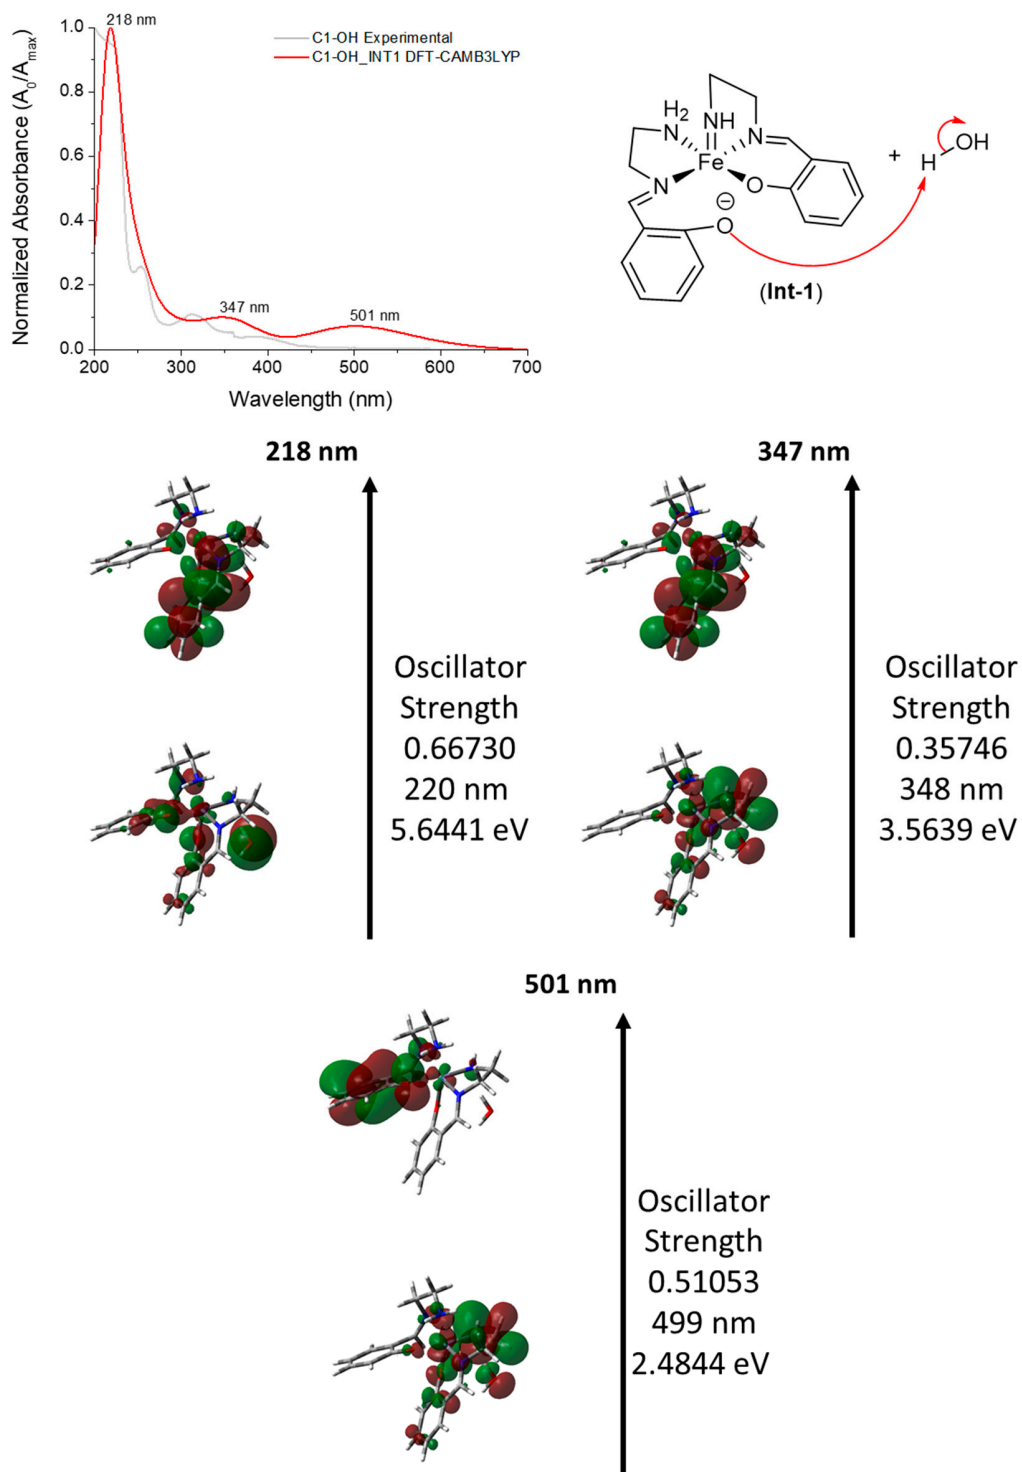

**Figure S13:** Experimental UV-Vis spectra of complex C1 + OH<sup>-</sup> and the calculated spectra of proposal intermediate Int-1 together to each electronic transition.

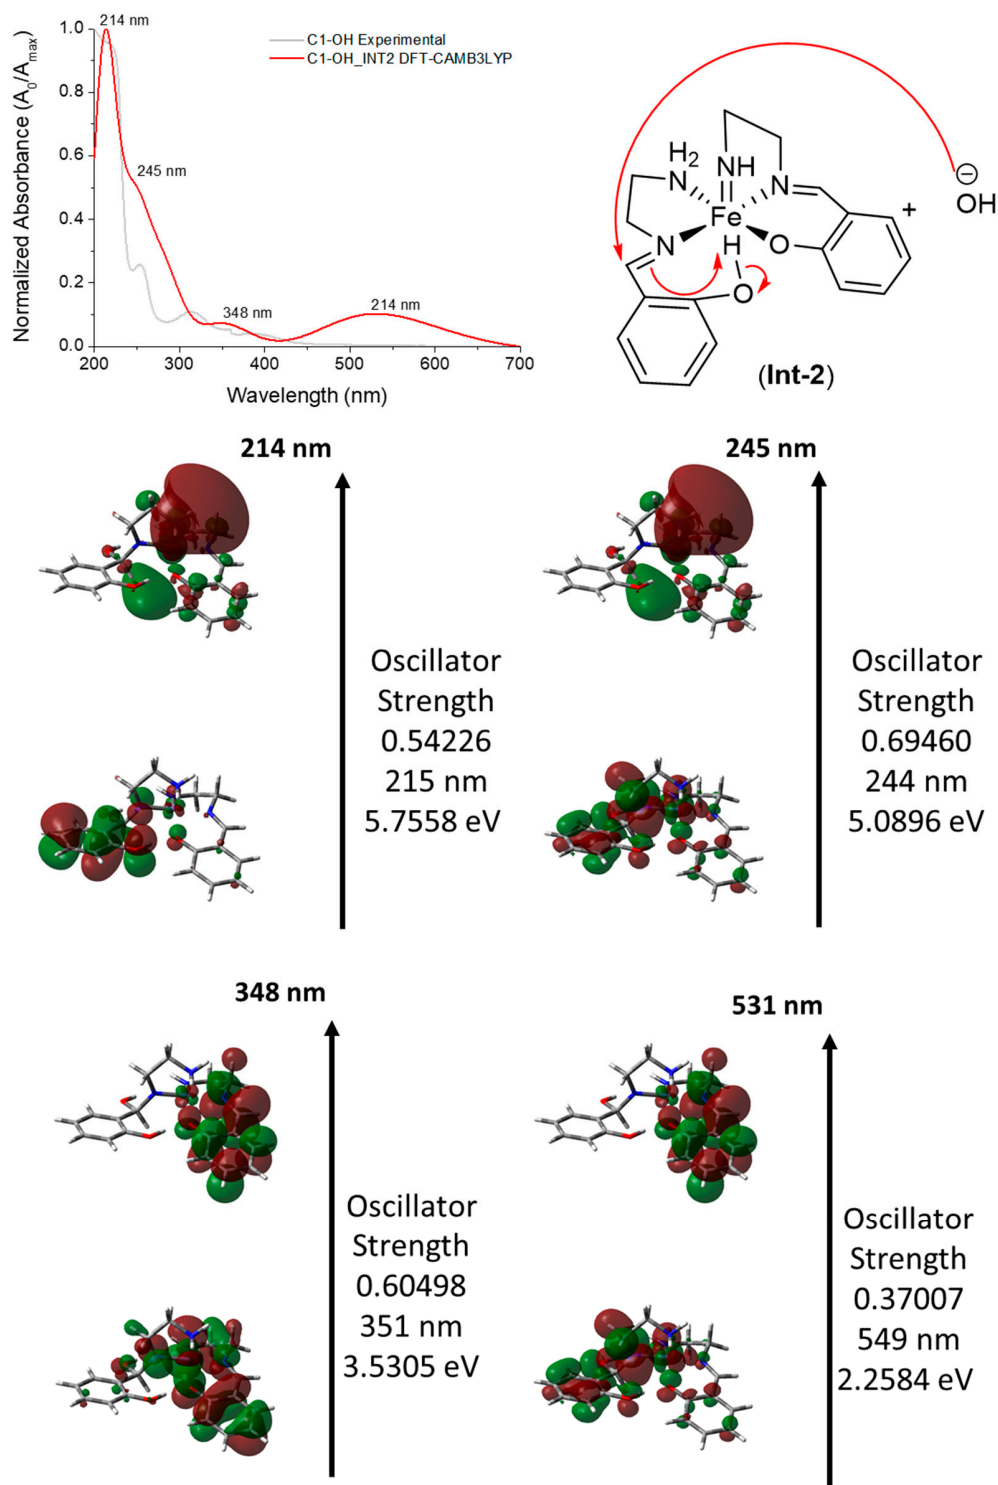

**Figure S14:** Experimental UV-Vis spectra of complex C1 + OH<sup>-</sup> and the calculated spectra of proposal intermediate Int-2 together to each electronic transition.

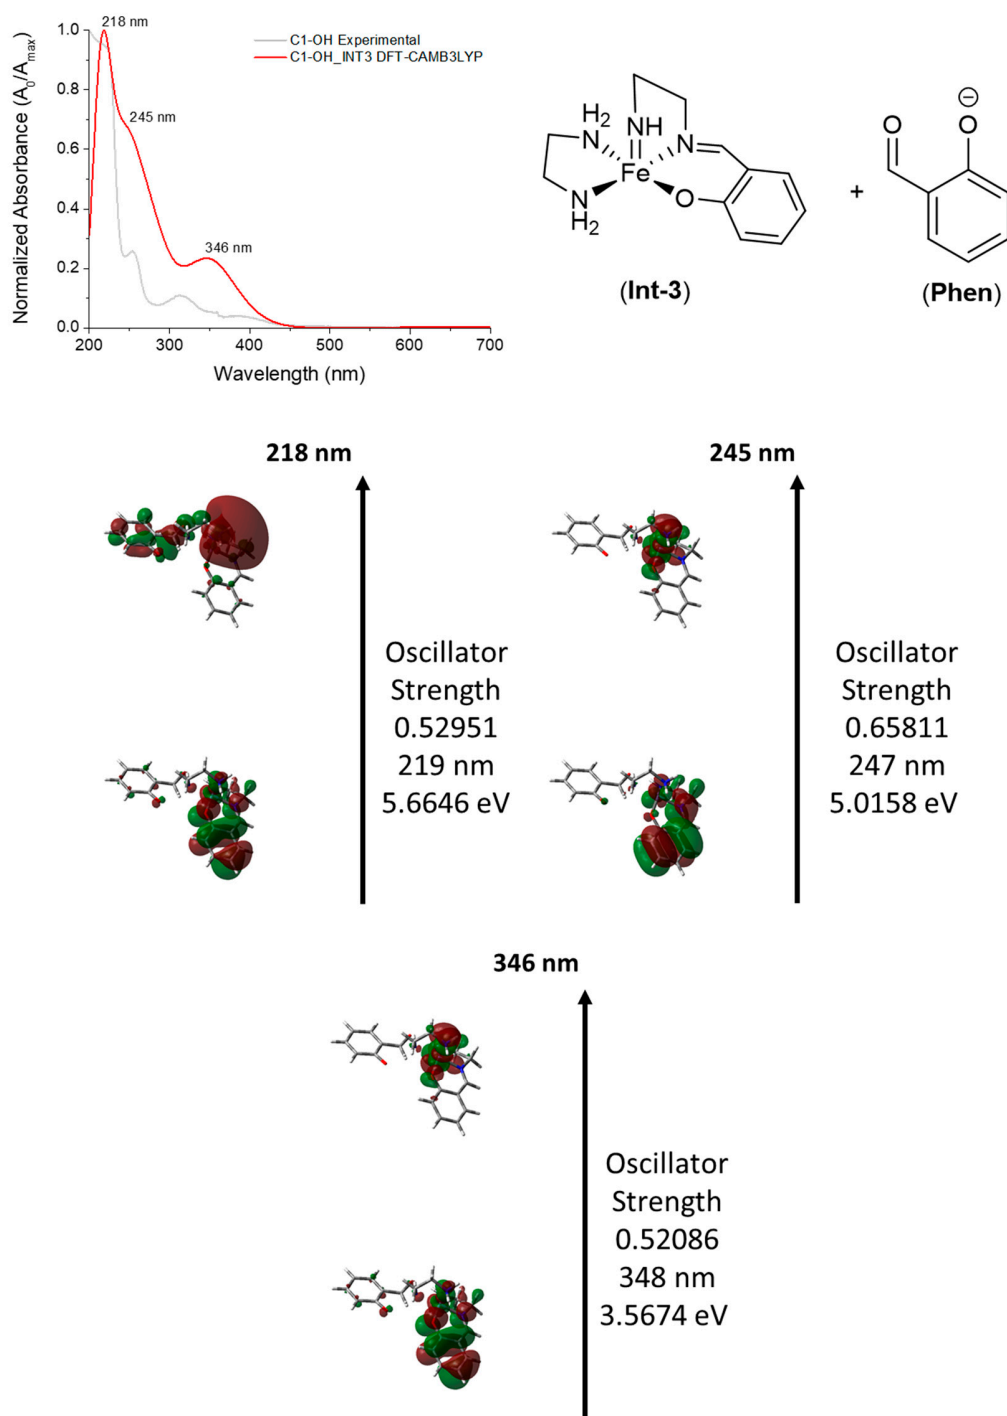

**Figure S15:** Experimental UV-Vis spectra of complex C1 + OH<sup>-</sup> and the calculated spectra of proposal intermediate Int-3 together to each electronic transition.

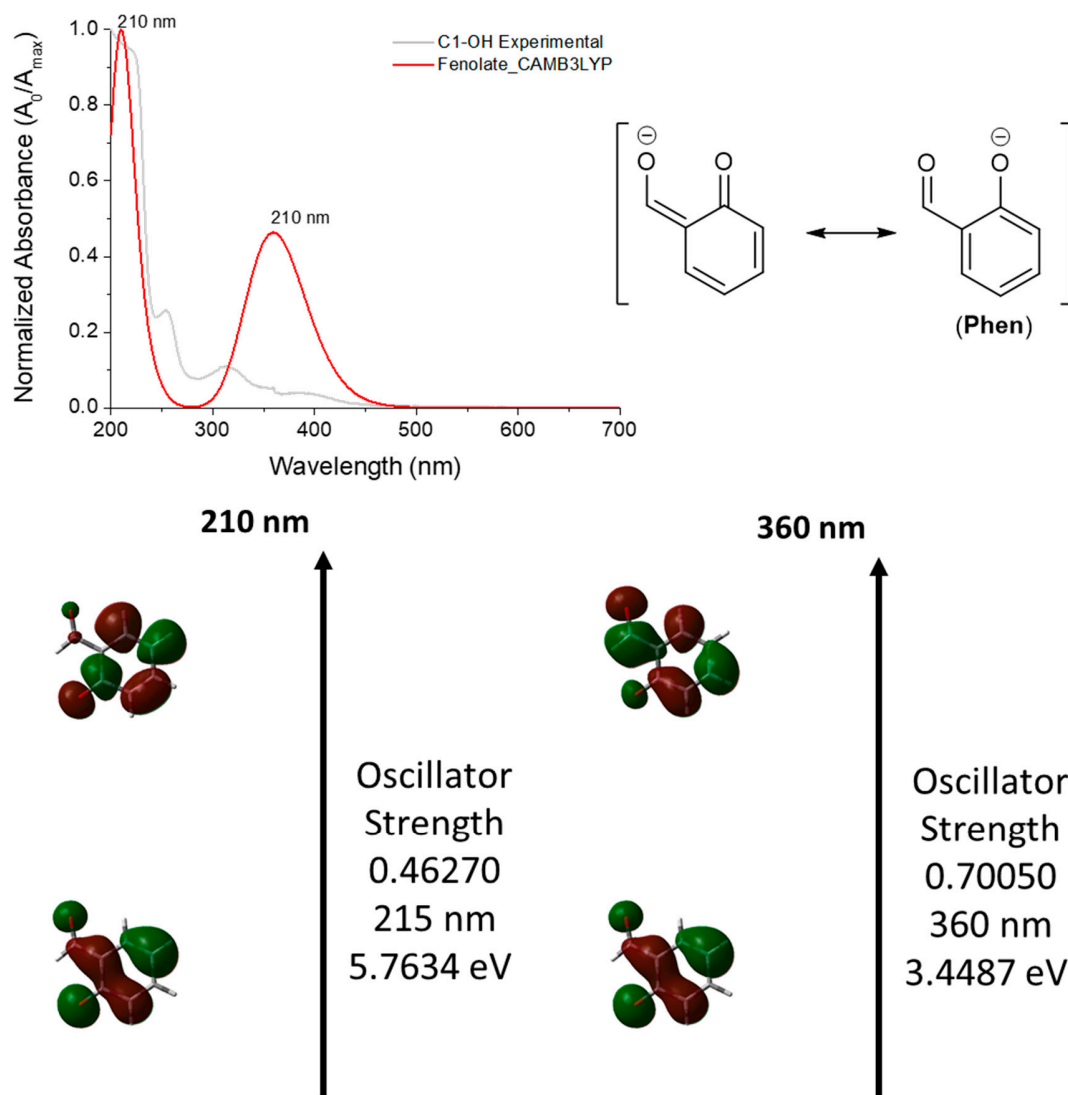

**Figure S16:** Experimental UV-Vis spectra of complex C1 + OH<sup>-</sup> and the calculated spectra of proposal intermediate phenolate together to each electronic transition.

### 3. Supplementary Tables

**Table S1:** Crystal data and details of structure refinement of complex C1.

|                                                                          |                                                                   |
|--------------------------------------------------------------------------|-------------------------------------------------------------------|
| Formula                                                                  | C <sub>18</sub> H <sub>22</sub> BrFeN <sub>4</sub> O <sub>2</sub> |
| Formula weight ( <i>gmol</i> <sup>-1</sup> )                             | 462.15                                                            |
| Crystal system                                                           | Triclinic                                                         |
| Space group                                                              | P-1                                                               |
| a (Å)                                                                    | 9.3079(9)                                                         |
| b (Å)                                                                    | 9.4322(9)                                                         |
| c (Å)                                                                    | 10.6985(9)                                                        |
| α (°)                                                                    | 90.652(3)                                                         |
| β (°)                                                                    | 92.762(4)                                                         |
| γ (°)                                                                    | 98.425(4)                                                         |
| V (Å <sup>3</sup> )                                                      | 927.89(15)                                                        |
| Z                                                                        | 2                                                                 |
| <i>D</i> <sub>calc</sub> ( <i>gcm</i> <sup>-3</sup> )                    | 1.654                                                             |
| μ (mm <sup>-1</sup> )                                                    | 2.986                                                             |
| F(000)                                                                   | 470                                                               |
| R <sub>int</sub>                                                         | 0,0323                                                            |
| Total reflections                                                        | 68598                                                             |
| Radiation                                                                | MoKα (λ = 0.71073)                                                |
| <i>I</i> > 2σ( <i>I</i> )                                                | 4108                                                              |
| <i>R</i> <sub>1</sub> , <i>wR</i> <sub>2</sub> <i>I</i> > 2σ( <i>I</i> ) | 0.0253, 0.0630                                                    |
| <i>T</i> (K)                                                             | 170                                                               |
| Maximum, minimum electron density (e/Å <sup>3</sup> )                    | 0.40/-0.63                                                        |

**Table S2:** Bond distances and selected angles in the metal coordination sphere of C1 at 170 K.

| Bond length (Å) |             |                   |            |
|-----------------|-------------|-------------------|------------|
| Fe1-O2          | 1.19192(15) | Fe1-N4            | 2.1921(17) |
| Fe1-N3          | 2.1117(17)  | Fe1-N2            | 2.2040(18) |
| F1-N1           | 2.1032(16)  | Fe1-O1            | 1.9205(15) |
| Bond angle (°)  |             |                   |            |
| O2-Fe1-N3       | 86.95(6)    | N1-Fe1-N2         | 77.37(6)   |
| O2-Fe1-N1       | 101.74(6)   | N4-Fe1-N2         | 85.00(7)   |
| O2-Fe1-N4       | 161.95(6)   | O1-Fe1-N3         | 95.52(6)   |
| O2-Fe1-N2       | 89.01(7)    | O1-Fe1-N1         | 86.26(6)   |
| O2-Fe1-O1       | 100.76(7)   | O1-Fe1-N4         | 89.66(7)   |
| N3-Fe1-N4       | 77.33(6)    | O1-Fe1-N2         | 162.37(6)  |
| N3-Fe1-N2       | 99.66(6)    | $\Sigma/^{\circ}$ | 79.6       |
| N1-Fe1-N3       | 170.69(7)   | $\Theta/^{\circ}$ | 226.1      |
| N1-Fe1-N4       | 93.56(6)    | $\alpha/^{\circ}$ | 100.8      |



**Table S3:** Cartesian Coordinates of each atom from iron (III) complex (C1)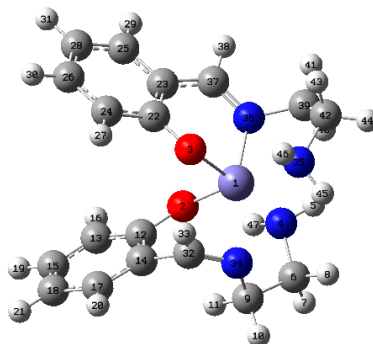

| Center Number | Atomic Number | Atomic Type | Coordinates (Angstroms) |           |           |
|---------------|---------------|-------------|-------------------------|-----------|-----------|
|               |               |             | X                       | Y         | Z         |
| 1             | 26            | 0           | 1.151449                | -0.143034 | 0.095905  |
| 2             | 8             | 0           | -0.20656                | -0.636271 | -1.101656 |
| 3             | 8             | 0           | -0.022426               | 0.798051  | 1.226841  |
| 4             | 7             | 0           | 2.307929                | -1.257847 | -1.21083  |
| 5             | 1             | 0           | 3.190967                | -0.848494 | -1.520992 |
| 6             | 6             | 0           | 2.517189                | -2.668285 | -0.72907  |
| 7             | 1             | 0           | 2.775222                | -3.335933 | -1.560823 |
| 8             | 1             | 0           | 3.352413                | -2.666339 | -0.019491 |
| 9             | 6             | 0           | 1.245024                | -3.13797  | -0.026393 |
| 10            | 1             | 0           | 1.429633                | -4.127152 | 0.412233  |
| 11            | 1             | 0           | 0.412401                | -3.232398 | -0.734358 |
| 12            | 6             | 0           | -1.359982               | -1.293471 | -0.726267 |
| 13            | 6             | 0           | -2.474145               | -1.287191 | -1.590906 |
| 14            | 6             | 0           | -1.453197               | -1.966497 | 0.53139   |
| 15            | 6             | 0           | -3.663009               | -1.929836 | -1.20833  |
| 16            | 1             | 0           | -2.393537               | -0.765858 | -2.540028 |
| 17            | 6             | 0           | -2.668216               | -2.567641 | 0.919941  |
| 18            | 6             | 0           | -3.768658               | -2.568109 | 0.047009  |
| 19            | 1             | 0           | -4.515734               | -1.920237 | -1.882293 |
| 20            | 1             | 0           | -2.743855               | -3.052654 | 1.890842  |
| 21            | 1             | 0           | -4.696467               | -3.05075  | 0.338877  |
| 22            | 6             | 0           | -0.87645                | 1.722041  | 0.724557  |
| 23            | 6             | 0           | -0.535211               | 2.54854   | -0.404598 |
| 24            | 6             | 0           | -2.121977               | 1.930693  | 1.369461  |
| 25            | 6             | 0           | -1.456079               | 3.538081  | -0.858119 |
| 26            | 6             | 0           | -3.016028               | 2.889427  | 0.886296  |
| 27            | 1             | 0           | -2.363879               | 1.319084  | 2.232927  |
| 28            | 6             | 0           | -2.691899               | 3.696873  | -0.237769 |
| 29            | 1             | 0           | -1.18256                | 4.169113  | -1.701576 |
| 30            | 1             | 0           | -3.974731               | 3.021548  | 1.381378  |

|    |   |   |           |           |           |
|----|---|---|-----------|-----------|-----------|
| 31 | 1 | 0 | -3.398274 | 4.439008  | -0.596149 |
| 32 | 6 | 0 | -0.268271 | -1.874549 | 1.416202  |
| 33 | 1 | 0 | -0.398101 | -1.372137 | 2.375473  |
| 34 | 7 | 0 | 0.969372  | -2.215613 | 1.113137  |
| 35 | 7 | 0 | 2.751816  | 0.26651   | 1.282523  |
| 36 | 7 | 0 | 1.646079  | 1.516821  | -0.725744 |
| 37 | 6 | 0 | 0.80479   | 2.513366  | -0.919253 |
| 38 | 1 | 0 | 1.175758  | 3.411803  | -1.421737 |
| 39 | 6 | 0 | 3.108516  | 1.733641  | -0.716752 |
| 40 | 1 | 0 | 3.610028  | 1.076023  | -1.434597 |
| 41 | 1 | 0 | 3.369069  | 2.765532  | -0.9834   |
| 42 | 6 | 0 | 3.55831   | 1.427117  | 0.739943  |
| 43 | 1 | 0 | 3.360556  | 2.301031  | 1.36751   |
| 44 | 1 | 0 | 4.631274  | 1.212657  | 0.786221  |
| 45 | 1 | 0 | 3.296448  | -0.59002  | 1.402358  |
| 46 | 1 | 0 | 2.315381  | 0.49806   | 2.179471  |
| 47 | 1 | 0 | 1.631565  | -1.233727 | -1.98452  |

---

**Table S4:** Cartesian Coordinates of each atom from iron (III) complex (C1) with analyte OH<sup>-</sup>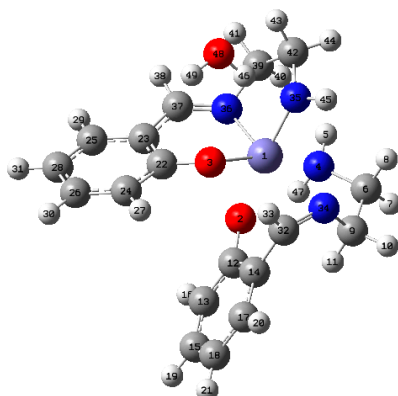

| Center Number | Atomic Number | Atomic Type | Coordinates (Angstroms) |           |           |
|---------------|---------------|-------------|-------------------------|-----------|-----------|
|               |               |             | X                       | Y         | Z         |
| 1             | 26            | 0           | 0.906591                | -0.686285 | -0.000385 |
| 2             | 8             | 0           | -0.71286                | -0.56668  | -1.14219  |
| 3             | 8             | 0           | 0.1817                  | 0.745654  | 1.050685  |
| 4             | 7             | 0           | 1.232547                | -2.22246  | -1.313531 |
| 5             | 1             | 0           | 2.174391                | -2.214446 | -1.702922 |
| 6             | 6             | 0           | 0.900125                | -3.559522 | -0.731622 |
| 7             | 1             | 0           | 0.813372                | -4.326725 | -1.514638 |
| 8             | 1             | 0           | 1.712825                | -3.837384 | -0.052333 |
| 9             | 6             | 0           | -0.40386                | -3.447809 | 0.060424  |
| 10            | 1             | 0           | -0.613271               | -4.42343  | 0.520492  |
| 11            | 1             | 0           | -1.245915               | -3.195393 | -0.598614 |
| 12            | 6             | 0           | -1.984333               | -0.662459 | -0.675628 |
| 13            | 6             | 0           | -3.072713               | -0.220447 | -1.471872 |
| 14            | 6             | 0           | -2.270455               | -1.182234 | 0.630009  |
| 15            | 6             | 0           | -4.386822               | -0.275906 | -0.985007 |
| 16            | 1             | 0           | -2.852494               | 0.180324  | -2.457718 |
| 17            | 6             | 0           | -3.59176                | -1.18798  | 1.121371  |
| 18            | 6             | 0           | -4.658706               | -0.754062 | 0.316748  |
| 19            | 1             | 0           | -5.204298               | 0.071463  | -1.614007 |
| 20            | 1             | 0           | -3.785182               | -1.551126 | 2.129908  |
| 21            | 1             | 0           | -5.677602               | -0.779437 | 0.69368   |
| 22            | 6             | 0           | -0.13464                | 1.936085  | 0.511836  |
| 23            | 6             | 0           | 0.572037                | 2.501979  | -0.604818 |
| 24            | 6             | 0           | -1.178013               | 2.704314  | 1.1018    |
| 25            | 6             | 0           | 0.22615                 | 3.796209  | -1.079924 |
| 26            | 6             | 0           | -1.515045               | 3.963262  | 0.598924  |
| 27            | 1             | 0           | -1.709403               | 2.272789  | 1.945094  |
| 28            | 6             | 0           | -0.815741               | 4.522489  | -0.502268 |
| 29            | 1             | 0           | 0.788682                | 4.217824  | -1.912269 |

|    |   |   |           |           |           |
|----|---|---|-----------|-----------|-----------|
| 30 | 1 | 0 | -2.325691 | 4.522749  | 1.061249  |
| 31 | 1 | 0 | -1.083119 | 5.504874  | -0.881003 |
| 32 | 6 | 0 | -1.109215 | -1.588394 | 1.464128  |
| 33 | 1 | 0 | -0.935774 | -1.02715  | 2.383255  |
| 34 | 7 | 0 | -0.19756  | -2.487608 | 1.174466  |
| 35 | 7 | 0 | 2.499801  | -1.011762 | 0.87655   |
| 36 | 7 | 0 | 2.0028    | 0.558539  | -0.975578 |
| 37 | 6 | 0 | 1.733472  | 1.827764  | -1.137588 |
| 38 | 1 | 0 | 2.475339  | 2.451521  | -1.647334 |
| e  | 6 | 0 | 3.378146  | 0.039416  | -1.161511 |
| 40 | 1 | 0 | 3.395849  | -0.663078 | -2.006356 |
| 41 | 1 | 0 | 4.079913  | 0.85055   | -1.39296  |
| 42 | 6 | 0 | 3.760443  | -0.674669 | 0.173946  |
| 43 | 1 | 0 | 4.369306  | 0.006246  | 0.786683  |
| 44 | 1 | 0 | 4.376307  | -1.562441 | -0.046359 |
| 45 | 1 | 0 | 2.563318  | -1.765392 | 1.562414  |
| 46 | 1 | 0 | 2.52643   | 0.522476  | 1.92465   |
| 47 | 1 | 0 | 0.536969  | -1.92151  | -2.008662 |
| 48 | 8 | 0 | 2.846213  | 1.35979   | 2.361859  |
| e  | 1 | 0 | 2.07073   | 1.914834  | 2.567882  |

---

Please contact corresponding author (Prof. Dr. Marco Mellado, marco.mellado@ucentral.cl) if you need any additional output file of the computational calculus.
